# Supplementary material for: Knockout of BRD7 results in impaired spermatogenesis and male infertility
Source: PubMed Central journal article supplement (PMC4754950; doi:10.1038/srep21776), 2016-02-16
Supplement: srep21776-s1.pdf [file srep21776-s1.pdf]

## **Knockout of BRD7 results in impaired spermatogenesis and male infertility**

Heran Wang<sup>1,2,\*</sup>, Ran Zhao<sup>2,\*</sup>, Chi Guo<sup>2</sup>, Shihe Jiang<sup>2</sup>, JingYang<sup>2</sup>, Yang Xu<sup>2</sup>, Yukun Liu<sup>2</sup>, Liqing Fan<sup>3</sup>, Wei Xiong<sup>2</sup>, Jian Ma<sup>2</sup>, Shuping Peng<sup>2</sup>, Zhaoyang Zeng<sup>2</sup>, Yanhong Zhou<sup>2</sup>, Xiayu Li<sup>4</sup>, Zheng Li<sup>2</sup>, Xiaoling Li<sup>2</sup>, David C. Schmitt<sup>5</sup>, Ming Tan<sup>5</sup>, Guiyuan Li<sup>1,2</sup>, Ming Zhou<sup>1,2</sup>

<sup>1</sup>The Affiliated Tumor Hospital of Xiangya Medical School, Central South University, Changsha, Hunan 410013, P.R. China;

<sup>2</sup>Cancer Research Institute, Central South University, Key Laboratory of Carcinogenesis, Ministry of Health, Changsha, Hunan 410078, P.R. China

<sup>3</sup>Institute of reproduction and stem cell engineering, Central South University, Changsha, Hunan 410078, P.R. China

<sup>4</sup>The Third Xiang-Ya Hospital, Central South University, Changsha, Hunan 410013, P.R.China

<sup>5</sup>Mitchell Cancer Institute, University of South Alabama, Mobile, Alabama 36604, USA

\*These authors contributed equally to this work.

Correspondence and requests for materials should be addressed to M.Z. (zhouming2001@163.com)

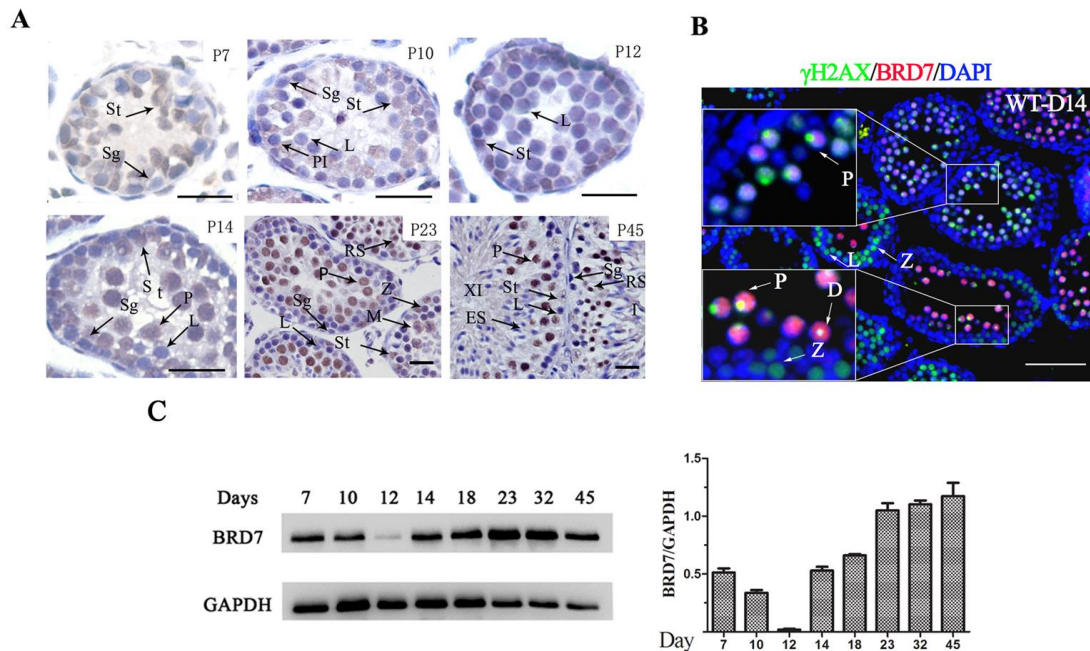

**Supplementary Figure S1. Expression pattern of BRD7 in mice testis development.**

(A) Immunostaining of testicular sections from wild-type mice at different postnatal days (P7, P10, P12, P14, P23 and P45) with anti-BRD7 antibody. The Roman numerals within each tubule denote the stage of the tubule as defined previously. During P7-P45, BRD7 was observed in the nucleus of St (arrows). During P10, BRD7 was undetectable in Sg and PL (arrows). At P12, BRD7 was undetectable in Sg and Z (arrows). At P14, BRD7 was observed in P. During P23, BRD7 was detectable in P, M and RS (arrows). At P45, BRD7 was detectable in the differentiation from P to RS (arrows). St, Sertoli; Sg, spermatogonia; PI, preleptotene spermatocytes; L, leptotene spermatocytes; Z, zygotene spermatocyte; P, pachytene spermatocyte; D, diplotene spermatocytes; M, meiotic germ cell; RS, round spermatid; ES, elongating or elongated spermatids. Scale bar: 50  $\mu$ m; (B) Immunofluorescence of seminiferous tubules from P14 mice showing  $\gamma$  H2AX-positive pachytene or diplotene spermatocytes (Green, XY body) express BRD7 (red); Leptotene and Zygotene spermatocytes expressing  $\gamma$ H2AX (Green, area of the whole nuclei) don't express BRD7 (red). Scale bar: 100 $\mu$ m. (C) Left panel, western blots of BRD7 in the testis from postnatal P7, P10, P12, P23, and P45. Right panel, histogram of gray-scale scanning analysis of the western blots.

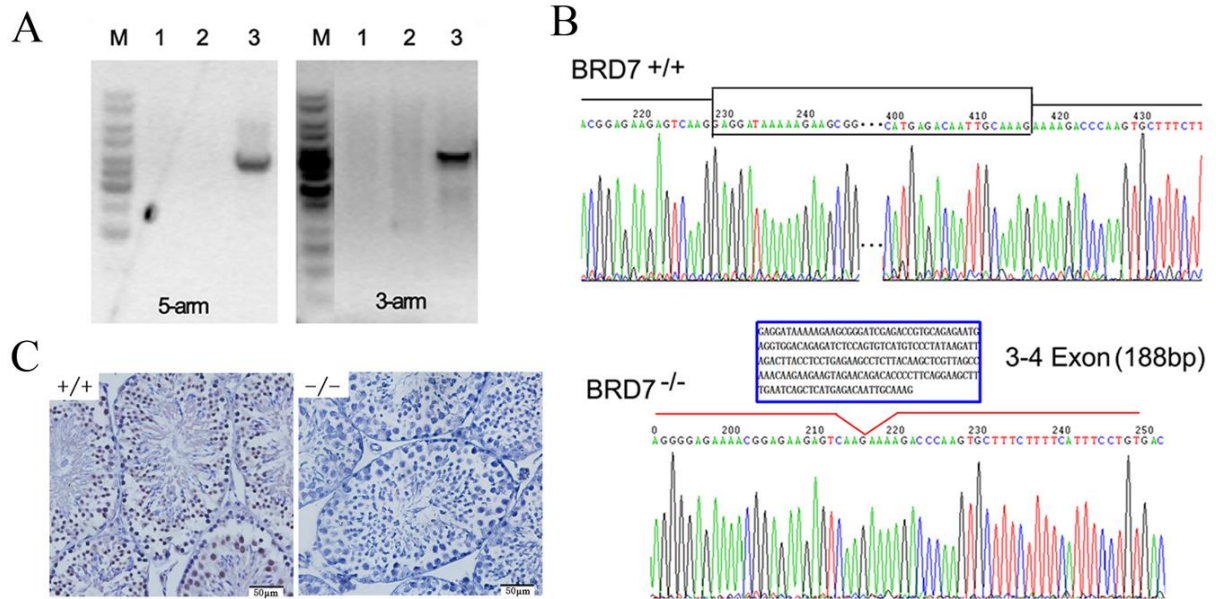

**Supplementary Figure S2. Generation and identification of BRD7-knockout mice.** (A) RT-PCR Identification of heterozygous mice with both 5'-arm and 3'-arm generated from chimeric male mice. The numbers represent the different mice. (B) Sequence identification according to exons 3 and 4 from BRD7<sup>+/+</sup> and BRD7<sup>-/-</sup> mice. (C) IHC analysis of testis sections from BRD7<sup>+/+</sup> and BRD7<sup>-/-</sup> mice with BRD7 antibody. Scale bar = 50  $\mu$ m.

**A**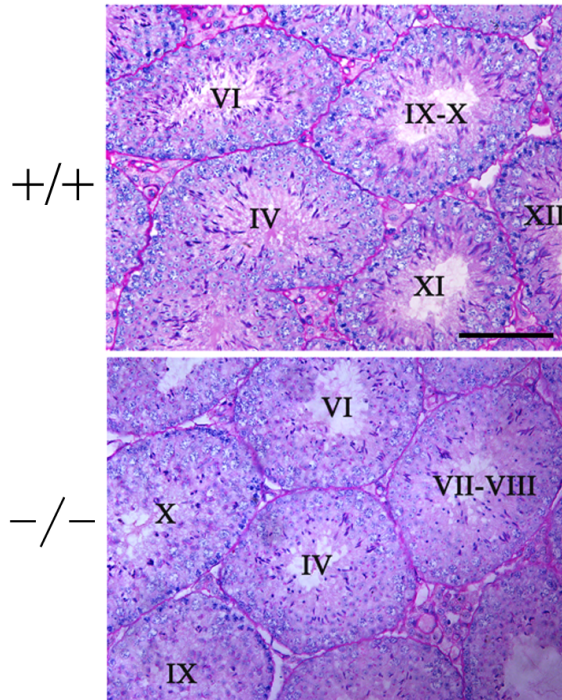**B**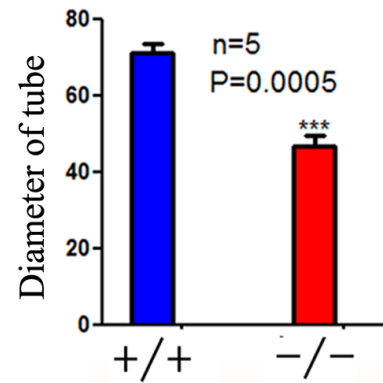

**Supplementary Figure S3. Comparison of the seminiferous tubules and testicular cells between BRD7<sup>+/+</sup> and BRD7<sup>-/-</sup> mice.** (A) PAS-H staining of testis sections from BRD7<sup>+/+</sup> and BRD7<sup>-/-</sup> mice. Roman number indicates different stage of eipthelium. Scale bar = 100 µm. (B) Comparison of the seminiferous tubule diameter of the testes from BRD7<sup>+/+</sup> and BRD7<sup>-/-</sup> mice. One hundred tubules were analyzed for each mouse.

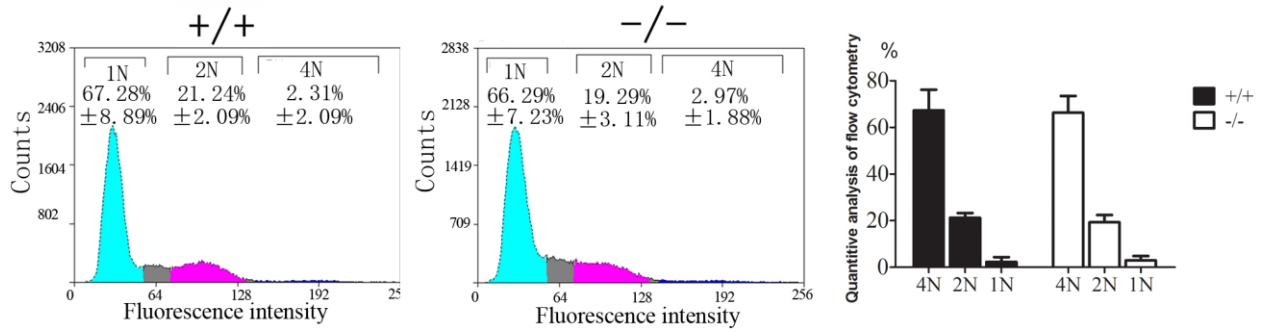

**Supplementary Figure S4. Flow cytometry analysis of germ cell types (tetraploid, diploid and haploid).** Flow cytometric analysis from DNA histograms of representative isolated testicular cells from BRD7<sup>+/+</sup> and BRD7<sup>-/-</sup> mice. Right panel show the histogram of flow cytometric analysis. 3 mice were used in each group.

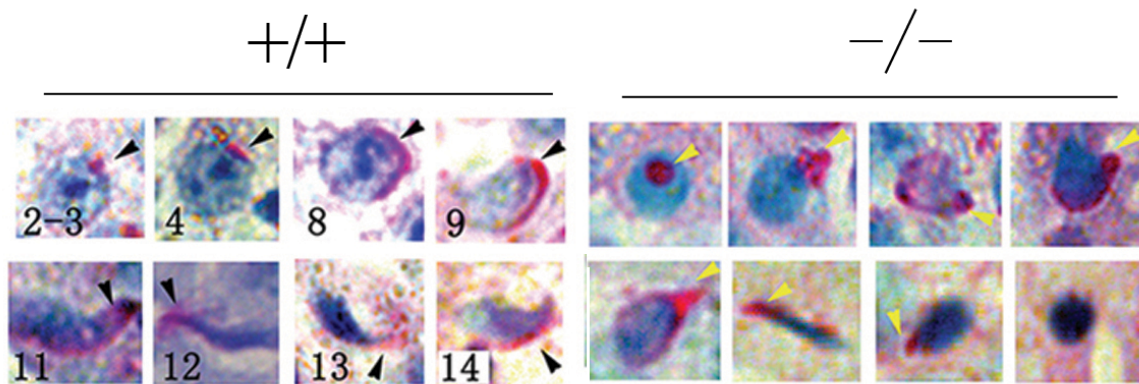

**Supplementary Figure S5. PAS-H staining of spermatids at different steps.** Numbers indicate the step of spermatids. Black arrows show the acrosome of wild type during development. Yellow arrows the abnormal acrosome of BRD7<sup>-/-</sup> acrosome.

**Supplementary Table S1.** Primers used for the identification of mouse genotypes by PCR

| Sort | Name    | Forward primers              | Reversed primers            | Product | Aims               |
|------|---------|------------------------------|-----------------------------|---------|--------------------|
| 1    | Frt-neo | GGCTATTCGGCTATG<br>ACTGG     | ATACTTTCTCGGCAG<br>GAGCA    | 288 bp  | Neo-cassette       |
| 2    | Cre     | GCGGTCTGGCAGTA<br>AAAACATATC | GTGAAACAGCATTG<br>CTGTCACTT | 100 bp  | E II $\alpha$ -Cre |
| 3    | LoxP1   | AGTTCCTATTCTCTA<br>GAAAG     | TCCCGCTTCTTTTAT<br>CCTC     | 215 bp  | LoxP1 site         |
| 4    | LoxP2   | CAAACCACACCTCTG<br>CCTTAG    | CACCCTCTTGGGACT<br>GCTT     | 241 bp  | LoxP2 site         |
| 5    | LoxP3   | AGTTCCTATTCTCTA<br>GAAAG     | ACCCTCTTGGGACTG<br>CTTTT    | 149 bp  | LoxP3 site         |
| 6    | WT      | TCCAGTAGATGGCA<br>GCAAAA     | ATTCTCTGCACGGTC<br>TCGAT    | 190 bp  | WT allele          |

**Supplementary Table S2.** Primers used for the detection of marker genes specifically expressed in some steps of spermatogenesis by real-time PCR

| Sort | Gene     | Forward primers      | Reversed primers     |
|------|----------|----------------------|----------------------|
| 1    | Anxa5    | TATCCCCCACCACATCATCT | TATCCCCCACCACATCATCT |
| 2    | Espin    | CCACAGGCTACCTCTCTTGC | CTGGTACAGCAGCCACTTCA |
| 3    | Plzf     | CCATGATCAAGCACCTGAGA | GTGGCCCTTCATGTGTTTCT |
| 4    | Sox9     | CTGAAGGGCTACGACTGGAC | TACTGGTCTGCCAGCTTCCT |
| 5    | Tubb3    | GGCATGGATGAGATGGAGTT | CCGATTCCTCGTCATCATCT |
| 6    | Scp3     | AAGCATTCTGGGAAATCTGG | GGAGCCTTTTCATCAGCAAC |
| 7    | Occludin | CGGTACAGCAGCAATGGTAA | CTCCCCACCTGTCGTGTAGT |
| 8    | Gapdh    | GGGTGTGAACCACGAGAAAT | ACAGTCTTCTGGGTGGCAGT |
| 9    | Zo1      | ACTCCCACTTCCCCAAAAAC | ACAGCTTTAGGCATGGTGCT |
| 10   | Tnp1     | GCATGAGGAGAGGCAAGAAC | GGATCGGTAATTGCGACTTG |
| 11   | Tnp2     | TCGACACTCACCTGCAAGAC | CTTGATCTTCGCCCTGAGC  |
| 12   | Prm1     | CAAAATTCCACCTGCTCACA | CATCTGCTCCTGCTTTTGCT |
| 13   | Prm2     | CCACAAGAGGCGTCGGTCAT | CCTGGCTCCAGGCAGAATG  |
| 14   | RhoB     | ACTATGTGGCGGACATCGAG | CACTTCTCGGGGATGTTCTC |
| 15   | Top2B    | GAAAGCGTGGAAAGAAGCAC | CGCCCTTTCGTATCTCTCTG |
| 16   | Rad23b   | CGCAGCTTCCACATTAGTGA | GGAATTCCCCTGAGCAAGTA |
| 17   | Pp2a     | TCGATCGCCTACAGGAAGTT | AGGCCATTGGCATGATTAAT |
